# 1 **A framework for *in situ* molecular characterization of coral** 2 **holobionts using nanopore sequencing**

3 Quentin Carradec<sup>1,2,\*†</sup>, Julie Poulain<sup>1,2,\*</sup>, Emilie Boissin<sup>3,4</sup>, Benjamin CC Hume<sup>5</sup>,  
4 Christian R Voolstra<sup>5,6</sup>, Maren Ziegler<sup>7</sup>, Stefan Engelen<sup>8</sup>, Corinne Cruaud<sup>8</sup>, Serge  
5 Planes<sup>2,3,4</sup>, Patrick Wincker<sup>1,2,†</sup>

6 <sup>1</sup>Génomique Métabolique, Genoscope, Institut François Jacob, CEA, CNRS, Univ Evry,  
7 Université Paris-Saclay, 91057 Evry, France.

8 <sup>2</sup>Research Federation for the study of Global Ocean Systems Ecology and Evolution,  
9 FR2022/Tara Oceans GO-SEE, 3 rue Michel-Ange, 75016 Paris, France.

10 <sup>3</sup>PSL Research University: EPHE-UPVD-CNRS, USR 3278 CRIOBE, Université de Perpignan,  
11 Perpignan Cedex, France.

12 <sup>4</sup>Laboratoire d'Excellence "CORAIL", 52 Avenue Paul Alduy, 66860, Perpignan, Cedex, France.

13 <sup>5</sup>Red Sea Research Center, Division of Biological and Environmental Science and Engineering  
14 (BESE), King Abdullah University of Science and Technology (KAUST) Thuwal, Saudi  
15 Arabia.

16 <sup>6</sup>Department of Biology, University of Konstanz, Universitätsstraße 10, 78457 Konstanz,  
17 Germany.

18 <sup>7</sup>Department of Animal Ecology & Systematics, Justus Liebig University, Giessen, Germany.

19 <sup>8</sup>Genoscope, Institut de biologie François-Jacob, Commissariat à l'Energie Atomique (CEA),  
20 Université Paris-Saclay, Evry, France.

21

22 \* These authors contributed equally to this work.

23 † Correspondence and requests for materials should be addressed to

24 [pwincker@genoscope.cns.fr](mailto:pwincker@genoscope.cns.fr) or [qcarrade@genoscope.cns.fr](mailto:qcarrade@genoscope.cns.fr).

## 25 **Abstract**

26 Molecular characterization of the coral host and the microbial assemblages  
27 associated with it (referred to as the coral holobiont) is currently undertaken via  
28 marker gene sequencing. This requires bulky instruments and controlled laboratory  
29 conditions which are impractical for environmental experiments in remote areas.  
30 Recent advances in sequencing technologies now permit rapid sequencing in the  
31 field; however, development of specific protocols and pipelines for the effective  
32 processing of complex microbial systems are currently lacking. Here, we used a  
33 combination of 3 marker genes targeting the coral animal host, its symbiotic alga,  
34 and the associated bacterial microbiome to characterize 60 coral colonies collected  
35 and processed *in situ*, during the *Tara Pacific* expedition. We used Oxford Nanopore  
36 Technologies to sequence marker gene amplicons and developed bioinformatics  
37 pipelines to analyze nanopore reads on a laptop, obtaining results in less than 24  
38 hours. Reef scale network analysis of coral-associated bacteria reveals broadly  
39 distributed taxa, as well as host-specific associations. Protocols and tools used in this  
40 work may be applicable for rapid coral holobiont surveys, immediate adaptation of  
41 sampling strategy in the field, and to make informed and timely decisions in the  
42 context of the current challenges affecting coral reefs worldwide.

## 43 **Introduction**

44 Coral reefs are threatened worldwide by global environmental changes and local  
45 anthropogenic pressures [1]. Studying coral reef ecosystems today is essential to  
46 understand what their stressors are and how their biodiversity will be affected in the

47 coming years. Coral holobionts are ecological units organized from an anthozoan  
48 cnidarian animal host (the coral) and its obligate photosynthetic dinoflagellate  
49 endosymbionts of the family Symbiodiniaceae [2]. These dinoflagellates are subject  
50 of numerous scientific studies given their predominant role in coral sensitivity and  
51 resilience to bleaching events [3]. However, an array of other organisms (Bacteria,  
52 Archaea, Fungi, Protists, and viruses) living within or around the coral colony may be  
53 as important as the dinoflagellate for coral holobiont health [4, 5]. For example,  
54 symbiotic cyanobacteria have been shown to be a source of nitrogen for the  
55 scleractinian coral *Montipora sp.* [6]. Conversely, several strains of *Vibrio* are putative  
56 causative agents of coral bleaching [7]. Development of high-throughput sequencing  
57 techniques have been fundamental in enabling our characterization of the taxonomic  
58 diversity that makes up the coral holobiont.

59 Morphological identification of coral species is challenging for the non-specialist and  
60 even for coral researchers, microscopy equipment is often required to distinguish  
61 between closely related species [8]. For the past 2 decades, genetic markers are  
62 used to help the identification of coral species or establish population structures of  
63 these intricate taxa. However, due to a slow nucleotide substitution rates for  
64 mitochondrial genes within anthozoans [9], common genetic markers such as the  
65 cytochrome c oxidase subunit I or the cytochrome b are not discriminant enough to  
66 identify corals at the species level [10, 11]. Nuclear markers like the 18S or the 5.8S  
67 rRNA [12, 13] are generally more variable between species although multi-locus and  
68 microsatellite analysis are often required to precisely determine species boundaries  
69 [14].

70 The most commonly used marker gene to study the diversity of coral symbionts in  
71 the Symbiodiniaceae diversity is the Internal Transcribed Spacer 2 (ITS2) region of  
72 the rDNA [15]. Whereas only 22 Symbiodiniaceae species are formally described,  
73 432 different ITS2 sequences recently grouped in seven genera are today referenced  
74 and may encompass a much larger number of species [2]. ITS2 is a multi-copy  
75 marker that can resolve Symbiodiniaceae at the level of taxa and strains, but the high  
76 intragenomic diversity of the ITS2 sequence poses analytical challenges in  
77 distinguishing intra- from inter-genomic diversity [16]. Different strategies have been  
78 developed to solve this problem including a novel analytical framework (“SymPortal”).  
79 This tool makes explicit use of the intragenomic diversity by employing the resolution  
80 of next-generation-sequencing approaches to determine ITS2 type profiles of  
81 putative Symbiodiniaceae taxa based on consistent co-occurrence of defining  
82 intragenomic ITS2 variants [17]. The large diversity of Symbiodiniaceae symbionts  
83 and numerous different microhabitats across coral reefs make the global  
84 comprehension of environmental and biological drivers of host-symbiont specificity  
85 challenging [18-20].

86 The 16S rRNA gene is the most commonly used marker to assess the bacterial  
87 diversity in coral holobionts [21]. Previous quantification of coral-associated bacterial  
88 assemblage richness have identified up to 100,000 distinct OTUs dominated by  
89 gamma- and alpha-proteobacteria [22]. Among them *Endozoicomonas* is probably  
90 the most abundant and widely distributed bacterial genus [23, 24]. For some coral  
91 species, the bacterial composition is highly variable according to coral reef site,  
92 environmental conditions, or seasons [25], whereas for other corals, bacterial  
93 compositions is rather fixed and less variable [26]. As such, comprehensive sampling

94 efforts are needed to discover all possible associations and to identify taxa of putative  
95 functional importance [27].

96 The recent development of the Minlon portable sequencer by Oxford Nanopore  
97 Technologies (ONT) allows real time long read sequencing and is practicable in the  
98 field. Barcoding experiments have been realized in various environments for the  
99 molecular identification of rare species [28-30]. However, very few studies have  
100 realize metabarcoding experiments on complex samples due to the lack of analysis  
101 pipelines able to work with long sequences and to manage the high error rate of  
102 nanopore sequencing for the taxonomic identification [31].

103 Here, we investigate the diversity of microbial assemblages associated with corals  
104 sampled around an isolated reef in north eastern Papua New Guinea (Kimbe Bay).  
105 Without access to bulky sequencing instruments and with limited laboratory facilities,  
106 we used the MinION device onboard the research vessel *Tara* to evaluate coral host  
107 identity as well as Symbiodiniaceae and bacterial composition of sampled coral  
108 specimens in the field. We used simultaneously three rRNA marker genes to  
109 characterize the coral holobiont: the full-length 18S rRNA for the coral host, the ITS2  
110 for Symbiodiniaceae diversity, and the 16S rRNA for the bacterial assemblages. In  
111 total, 55 samples of scleractinian corals from 13 different genera and 5 samples of  
112 the fire coral *Millepora* (Hydrozoa) were assessed.

## 113 **Results**

### 114 **Coral sample collection and nanopore sequencing of marker genes.**

115 A total of 60 coral colonies were collected at 4 sites in Kimbe bay, Papua New  
116 Guinea during a 12-day research trip in December 2017 onboard the *Tara* vessel as  
117 part of the *Tara* Pacific expedition (Figure 1). In order to identify Symbiodiniaceae  
118 and the bacterial community associated with each coral, we extracted DNA from  
119 each colony and sequenced 3 different marker genes on the Oxford Nanopore  
120 MinION device (Figure 2 and Methods). For each colony, the full-length 18S rRNA  
121 sequence (1.8 kb) was PCR-amplified with primers designed for coral identification  
122 [32], the ITS2 region (250bp) was amplified with primers specific for the  
123 Symbiodiniaceae family [16], and the full-length 16S rRNA (1.3 kb) with bacteria-  
124 specific primers [33]. 12 unique identifier sequences (barcodes) were added to the  
125 5'ends of each primer pair. This strategy allowed us to sequence the holobiont of 12  
126 coral colonies in a single MinION run lasting 24h (Figure 2).

127 After 5 sequencing runs over a period of 10 days, we obtained a total of 2,019,607  
128 reads (2.0 Gb) from 60 coral colonies and the unique barcodes were recognized for  
129 32% of the sequences on average (Supplementary Table S1). For 48 samples, more  
130 than one thousand demultiplexed sequences were obtained for each barcode, which  
131 is seemingly sufficient to identify the coral as well as dominant Symbiodiniaceae and  
132 bacterial taxa. For the 12 remaining samples (11 sequenced during the last run), the  
133 number of reads was too low to identify the coral and the bacterial community. In this  
134 last run, most of the nanopore channels became inactive within a few seconds of run

135 resulting in a very low output. This phenomenon is most probably due to the  
136 conservation of the flow cell for more than 2 months before the run which is longer  
137 than ONT specifications. However, the number of sequencing reads obtained was  
138 sufficient to study the ITS2 amplicon, we then decided to keep this MinION run for  
139 downstream analysis. The identification of 18S rRNA, ITS2 and 16S rRNA and  
140 sequences was realized by the mapping of nanopore reads against specific  
141 databases for each marker gene (see Methods).

#### 142 **Identification of corals, Symbiodiniaceae, and bacterial communities**

143 Corals were identified by both their morphological traits (Supplementary Figure S1)  
144 and the analysis of 18S rRNA sequences. A full-length 18S rRNA consensus was  
145 obtained for 50 corals covering 10 scleratinia families and the fire coral *Millepora*.  
146 The coral identification with the 18S rRNA was limited at the genus level for non-  
147 acroporid corals because the 18S rRNA sequence is not discriminant at species level  
148 for these genera [12] (Supplementary Table S2). A phylogenetic tree was  
149 reconstructed confirming the taxonomic identification of these corals (Supplementary  
150 Figure S2). The DNA extraction and/or the PCR amplification failed for 10 coral  
151 colonies. In these cases we based our identification on the morphological traits only.

152 In order to identify Symbiodiniaceae diversity in each coral colony, nanopore reads  
153 were mapped against a database of 432 *Symbiodinium* ITS2 sequences [18].  
154 Several Symbiodiniaceae species may coexist in a coral colony so we can expect  
155 multiple ITS2 sequences per sample. So for each sample, ITS2 sequences covered  
156 with at least 1% of all nanopore reads aligned were conserved. In 53 of the sampled

157 coral colonies we succeeded in identifying at least 1 ITS2 sequence. A similar  
158 method was used to characterize the bacterial community from the full-length 16S  
159 rRNA (see Methods).

160 In order to get a broad overview of the coral holobionts analyzed in this study, we  
161 constructed a force-directed graph (Figure 3). This network showed that  
162 Symbiodiniaceae taxonomy correlates to coral host at the family level, whereas  
163 bacterial specificity to its host is dependent on the bacterial taxa. Some bacterial taxa  
164 are detected in almost all coral hosts sampled (in the centre of Figure 3), while others  
165 appear host-specific.

#### 166 **Symbiodiniaceae diversity in coral holobionts**

167 Symbiodiniaceae ITS2 sequences from taxa in the genus *Durusdinium* (clade D)  
168 were dominant in 22 coral colonies including 4 Fungiidae colonies and all  
169 *Diploastrea*, *Galaxea*, and *Pocillopora* (Figure 3 and Figure 4a). A total of 8 different  
170 ITS2 sequences were reconstructed from these samples. The D1 (*D. glynni*) is the  
171 relatively most abundant sequence representing between 40% and 60% of reads in  
172 each coral colony. D2, D3, D4, D10, and D17 were recovered in all of these colonies  
173 in lower proportions suggesting non-specific alignment of ONT reads. To test this  
174 hypothesis, we re-sequenced the same PCR amplicons using Illumina technologies,  
175 which have a reduced sequencing error rate (Figure 4b). Sequencing results  
176 confirmed the dominance of the D1 sequence in these 22 coral colonies, but also  
177 revealed distinct patterns of less abundant, i.e. minor, ITS2 sequences: D4 in  
178 Fungiidae, *Diploastrea* and *Galaxea* colonies, and D2 in *Pocillopora* colonies. These



179 differences between ONT and Illumina reveal a limitation for the identification of  
180 minor ITS2 sequences of the genus *Durusdinium* with the current error rate of ONT  
181 sequences.

182 Several sequences representing *Cladocopium* taxa (clade C) were detected in  
183 different coral families (Figure 3 and Figure 4a). The C3 and C40 sequences (1  
184 insertion and 1 substitution between them) were present in all *Acropora* colonies.  
185 Their co-presence is confirmed with the Illumina sequencing (Figure 4b and  
186 Supplementary Figure S3). Three *Cladocopium* sequences were also recovered from  
187 the *Millepora* colonies: C57, C66, and C74 in consistent proportion (9% C74, 72%,  
188 C66, 19% C57) (Figure 4a). C57 and C74 variants (respectively 1 and 2 substitutions  
189 with C66) were not observed with Illumina sequencing suggesting that their detection  
190 is also due to the error rate of ONT sequences. We detected C15 sequences in all  
191 *Porites* colonies and C60, a C15-derived sequence (2 substitutions) confirmed by  
192 Illumina sequencing, in 1 colony (Figure 4a). Finally, 7 coral colonies from 6 different  
193 genera present a large diversity of *Cladocopium* ITS2 variants, however several  
194 samples of the same coral species would have been necessary to substantiate these  
195 associations (Figure 4a).

196 Sequences from the *Cladocopium* and *Durusdinium* genera were found co-occurring  
197 in 4 colonies: one *Plathygyra* with the C40 and D1, one *Symphyllia* colony with C3,  
198 C40 and D1, one *Pavona* colony with the C116 and the D6 and one *Pocillopora* with  
199 C116 and D1 ITS2 sequences (Figure 4). The co-occurrence of these two genera in a  
200 coral colony were previously reported in Papua New Guinea [34].

## 201 **Coral-associated bacterial assemblages**

202 We retrieved 1,637 unique bacterial 16S sequences belonging to 77 orders of  
203 bacteria. Among these sequences, 175 are detected in 2 or more coral colonies.  
204 These Bacteria were identified in 31 coral colonies (Supplementary Table S2 and  
205 S3). Of the coral colonies sampled, *Oceanospirillales* was the most common  
206 bacterial order (detected in 22 coral colonies), followed by *Rhizobiales* (12),  
207 uncharacterized alphaproteobacteria (12) and *Chromatiales* (11) (Supplementary  
208 Table S2 and S3). These marine bacteria are commonly detected in a large diversity  
209 of corals colonies and are known to be associated with coral tissue and mucus. For  
210 instance, *Endozoicomonadaceae* (*Oceanospirillales*) are known to be abundant in  
211 healthy mucus and absent or in very low abundance in diseased corals [25, 35-38].  
212 Their presence in a large number of corals (20 colonies including *Poritidae*,  
213 *Pocilloporidae*, *Acroporidae*, and *Milleporidae*) may indicate the health of this coral  
214 reef, although the functional role of *Endozoicomonas* remains elusive [23, 39].  
215 Among the 186 unique full-length 16S sequences belonging to the *Endozoicomonas*  
216 family, several are shared between different coral hosts (maximum of 12 samples)  
217 showing that the family is large, commonly found in corals, but also display a pattern  
218 of fine-scale genetic differentiation with host (Supplementary Table S3) as recently  
219 shown [40, 41]. In addition, *Ectothiorhodospiraceae* family and *Kordiimonadales*  
220 order detected in several samples were so far not commonly identified within corals.  
221 From our data, we argue that they may represent important families, either for this  
222 particular reef or in a broader context, awaiting further studies.

223 At the same time, we found opportunistic bacterial taxa known to be associated with  
224 corals under stress. For instance, a bacterium belonging to the *Vibrionaceae* family

225 was detected in one colony of *Galaxea* (*Euphylliidae*). This family of bacteria has  
226 been described to be prevalent in diseased corals [42, 43]. Furthermore, two  
227 *Alteromonadales* species were detected in this colony. *Shewanellaceae*, already  
228 described in *Favia* corals [44], and *Pseudoalteromonadaceae* describe in corals  
229 affected by sedimentation and local sewage [45] suggests that this colony may be  
230 under stress.

231 An endosymbiotic bacterium of *Millepora* belonging to *Spirochaetaceae* family was  
232 detected in four out of five coral colonies and a *Kordiimonadales* bacterium in two  
233 colonies, these bacterial families were already described in healthy as well as sick  
234 tissues of *Millepora* [46, 47]. The Gammaproteobacteria *Congregibacter* (OM60,  
235 *Alteromonadales*) was also detected in two colonies; this photosynthetic bacterium is  
236 found abundant in coastal ecosystems, but was never reported in association with  
237 *Millepora* [48]. Three other bacterial families (*Clostridiaceae*, *Desulfobacteraceae* and  
238 *Bacteroidales*) were detected in one sample of *Millepora* (P03-C051) suggesting a  
239 diseased colony (Figure 2 and Supplementary Table S2) [49, 50]. The aspect of this  
240 *Millepora* colony with the presence of parasites, the strong space competition with  
241 other coral species and the presence of dead parts colonized by algae corroborate  
242 this hypothesis based on the bacterial composition (Supplementary Figure S1).

## 243 **Discussion**

244 Recent studies have shown the efficiency of Nanopore sequencing technology for  
245 rapid species identification in the field in remote locations [28, 29]. However, this  
246 technology has so far not been applied to characterize complex ecosystems or

247 holobionts. In this study, the MinION device was used to describe the diversity of one  
248 of the most diverse ecological units on earth: the coral holobiont [51].

249 A discriminant marker gene for all corals is still lacking, but the full-length 18S rRNA  
250 sequence used in this study was sufficient to identify corals at the species level for  
251 acroporids and at the genus level for most of the other corals. Coral identification with  
252 18S rRNA sequencing in the field may open coral studies to non-specialist in contrary  
253 to the morphological identification that requires taxonomic expertise. Moreover, the  
254 identification in less than 24h on MinION device could significantly evolve sampling  
255 methods for corals. Given the ongoing uncertainties with coral taxonomy  
256 designations at the species level, it should be noted that even a designation of corals  
257 to the genus level, may be considered a big step forward with regard to diversity  
258 assessment to aid conservation efforts.

259 In addition to the identification of the coral host species, we successfully  
260 characterized the Symbiodiniaceae community and recovered sequences from the  
261 dinoflagellate genera *Cladocopium* and *Durusdinium*. *Cladocopium* symbiont genus  
262 is the most diverse of the Symbiodiniaceae family in the Arabian Seas, the Indo-  
263 Pacific, and the Atlantic-Caribbean [20, 52, 53]. This diversity is mainly driven by  
264 rapid host specialization, but also by specific environmental conditions [54],  
265 suggesting that the diversity may be best explained by local adaptation to the  
266 environmental condition of this remote reef. If correct, this suggests sampling more  
267 coral reefs is essential to get a complete view of all possible Symbiodiniaceae  
268 symbionts for a coral species. Sequences belonging to the *Symbiodinium* genus  
269 (clade A) were not detected in any coral colony sampled in Kimbe Bay, corroborating

270 previous observations in PNG [34]. The comparison between the two sequencing  
271 technologies has reveal a limitation in the identification of the symbiont taxa with  
272 ONT. Although the dominant symbiont in each coral has always been correctly  
273 assigned in our study, rare taxa are sometimes mis-assigned due to the low  
274 sequencing depth and the high error rate of nanopore sequencing.

275 Regarding the coral-associated bacterial assemblages, we observed highly distinct  
276 phyla. Among those, we found common marine bacteria associated to coral mucus  
277 as well as more specific endosymbiotic relationships. Although the sequencing depth  
278 is insufficient to detect rare bacterial taxa, our results support that bacterial  
279 community composition assessed with the current technology may be used as an  
280 indicator of coral health.

281 The small size of the MinION sequencer coupled to a simple laptop is particularly  
282 convenient for use on a research vessel where the work space and electricity use are  
283 extremely limited. At present, this device is the only one able to execute a complete  
284 sequencing run under these conditions. A -20°C freezer is sufficient to conserve  
285 reagents for DNA extraction, ONT library preparation, and MinION sequencing,  
286 allowing molecular experimentations during long-term expeditions in distant islands in  
287 total autonomy. In addition, several new developments ongoing by ONT to lyophilize  
288 sequencing reagents will be useful improvements to enable room temperature  
289 storage of reagents for several months.

290 The bioinformatic pipeline developed in this article can be run on a simple laptop  
291 without internet access, so long as reference databases are prepared and  
292 downloaded before the expedition. The method described in this study will

293 significantly improve the capability of local surveys and enable researchers in remote  
294 locations to make informed and effective sampling and experimental decisions while  
295 in the field. This approach also carries an element of capacity building in remote  
296 areas, as it allows local users to have full access over the data generated and  
297 analysed. In remote places, this method could be performed to rapidly evaluate the  
298 state of numerous coral colonies on a reef in terms of holobiont diversity and then  
299 orient further sampling in the most interesting features like the presence of  
300 unexpected bacteria or Symbiodiniaceae or rare coral species.

301 In addition, ONT allows the sequencing of full marker genes instead of short  
302 amplicon regions, often insufficient for resolving taxonomies to the species level.  
303 Long-read sequencing have already shown their efficiency on coral holobiont  
304 characterization [33]. The main limitation of this technology is the current error rate  
305 that we aimed to address here through the generation of consensus sequences from  
306 reads aligned on each sequence of the database. Despite this analysis pipeline, very  
307 similar sequences diverging by a single nucleotide could be assigned incorrectly as  
308 was the case for minor variants of *Durusdinium* D1 and *Cladocopium* C66. Future  
309 development could use the Intramolecular-ligated Nanopore Consensus (INC-Seq)  
310 method to correct remaining sequencing mistakes and allow *de novo* identification of  
311 sequences without reliance on reference databases [55]. The expected  
312 improvements in error rates will impact the bacterial detection by diminishing the  
313 number of reads necessary to confidently build a consensus, which is presently high.  
314 This would lead to delineation of a more complex microbiome.

315 Coral holobionts require large sampling efforts to obtain an accurate and complete  
316 network of the diversity of coral-associated Symbiodiniaceae and bacteria present in  
317 a reef. The here-presented study realized in Papua New Guinea demonstrates the  
318 efficacy of the nanopore method for a rapid survey of a large number of coral  
319 colonies which could help future evaluation of threatened coral reefs and holds  
320 applications for monitoring with a substantial component of capacity building.

## 321 **Materials and Methods**

### 322 **Coral and Hydrozoa sampling and DNA extraction**

323 60 coral samples were collected between 5 m to 20 m depth by removing a fragment  
324 on four different reefs of the Kimbe Bay in Papua New Guinea (New Britain island)  
325 (Figure 1). Various families of scleractinian corals as well as the hydrozoan genus  
326 *Millepora* were collected (Supplementary Figure S1). Coral fragments were placed in  
327 zip-lock bags under water then stored in 2 ml RNase/DNase free tubes containing  
328 Lysing Matrix A (MP Biomedical) and 1.5 ml of DNA/RNA shield preservative buffer  
329 (Zymo Research, Irvine, California, USA). Samples were then placed in a Terralyzer  
330 Instrument (Zymo Research) and grinded during 2 minutes. Grinded samples (500 µl)  
331 were incubated 30 minutes at 55°C with 75 µl of proteinase K. Then, 1.5 ml of Lysis  
332 Buffer (ZR-DuetDNA/RNA Miniprep Plus, Zymo Research) was added for 15 minutes  
333 at room temperature (around 35°C). Coral DNA was then extracted using the ZR-  
334 DuetDNA/RNA Miniprep Plus Kit following the manufacturer's instructions. DNA was  
335 quantified on a Qubit dsDNA HS Assays (Thermo Fisher Scientific, Waltham, USA).  
336 High resolution coral pictures were archived at the European Bioinformatics Institute.

### 337 Full-length marker gene amplification

338 The ITS2, 18S and 16S rRNA sequences were targeted for amplicon generation. For  
339 each primer, the ONT tail and one unique barcode (out of twelve) were added. Full-  
340 length 18S rRNA primers: TTTCTGTTGGTGCTGATATTGC-Barcode-  
341 AACCTGGTTGATCC TGCCAGT for the forward and  
342 ACTTGCCTGTCGCTCTATCTTC-Barcode- TGATCCTTCTGCAGGTTACCTAC for  
343 the reverse primer [32]. Bacterial-specific 16S rRNA primers: 27F  
344 (TTTCTGTTGGTGCTGATATTGC-Barcode-AGAGTTTGATCMTGG CTCAG) and  
345 1492R (ACTTGCCTGTCGCTCTATCTTC -Barcode- TACGGYTACCTTGTTA  
346 CGACTT) [33]. SYM\_VAR ITS2 primers: TTTCTGTTGGTGCTGATATTGC-Barcode-  
347 GAATTGCAGAACTCCGTGAACC for the forward and  
348 ACTTGCCTGTCGCTCTATCTTCT-Barcode-CGGGTTWCWCTTGTYTGACTTCATGC  
349 for the reverse [16]. PCRs were performed on board using 25 ng of DNA from each  
350 coral sample with the Advantage 2 kit (Takara Clontech) and a final primer  
351 concentration of 0.5  $\mu$ M in a final reaction volume of 50  $\mu$ l. PCR conditions were  
352 optimized to be able to generate the three amplicons using the same thermocycling  
353 program: initial denaturing at 95 °C for 1 min, 30 cycles each at 95 °C for 30 s, 55°C  
354 for 30 s, and 68 °C for 1 m, followed by a final extension step at 68 °C for 10 min.  
355 Twelve barcodes were available per primer set and allowed us to process DNAs from  
356 12 samples in parallel on one 96 well PCR plate.

357 PCR products for each sample were pooled by targeted gene in equimolar ratios  
358 then each pool was 1:10 diluted and subsequently cleaned with 1 volume of AMPure  
359 XP (Beckman Coulter, Brea, California, USA) before quantification. 2.5 ng of ITS2-  
360 PCRs-pool, 250 ng of 16S-PCRs-pool and 250 ng of 18S-PCRs-pool were mixed to



361 constitute the input of the ONT sequencing library. The smaller amount of ITS2-  
362 PCRs-pool was aimed at compensating for amplification bias, as PCR products for  
363 shorter sequences would result in a higher number of molecules sequenced.

#### 364 **ONT library preparation and sequencing**

365 Sequencing libraries were prepared for R7.9 flow cells run (FLO-MAP107) on  
366 MinION device using the Low Input by PCR Sequencing Kit SQK-LWP001 according  
367 to the four-primers PCR protocol from ONT with slight modifications detailed below.  
368 In order to add the Whole Genome Primers, a second multiplex PCR was performed  
369 from 500 ng of the PCR pool and a final primer concentration of 0.5  $\mu$ M in a reaction  
370 volume of 50  $\mu$ l. The following PCR conditions were used: initial denaturing at 95  $^{\circ}$ C  
371 for 3 min, 15 cycles at 95  $^{\circ}$ C for 30 s, 56 $^{\circ}$ C for 30 s, and 68  $^{\circ}$ C for 1 m, followed by a  
372 final extension step at 68  $^{\circ}$ C for 10 min. PCR products were cleaned with 0.8 volume  
373 of Ampure XP and finally eluted in 20  $\mu$ l of 10mM Tris-HCl pH8 with 50 mM NaCl. 50-  
374 100 fmol of PCR products were diluted in 9  $\mu$ l then mixed with 1  $\mu$ l of Rapid 1D  
375 Adapter and 1  $\mu$ l of Ligase T4 Blunt (New England Biolabs, Ipswich, MA, USA). Pre-  
376 sequencing mix was incubated 10 min at 25 $^{\circ}$ C and left on ice until ready to load.  
377 After priming the flow cell according to the manufacturer's recommendations, 11  $\mu$ l of  
378 pre-sequencing mix was combined with 30.5  $\mu$ l of Running Buffer with Fuel Mix  
379 Buffer, 7  $\mu$ l of water and 26.5  $\mu$ l of Library Loading Beads and applied to the flow cell.  
380 The sequencing run was performed for 12 to 24 hours. Bases were called during the  
381 MinION run with the MinKnow software (v. 1.7.14). The demultiplexing and adaptor  
382 trimming were done with porechop tool (<https://github.com/rrwick/Porechop>) with the

383 option discard\_middle. Sequences are archived at the European Bioinformatics  
384 Institute.

### 385 **Read mapping, consensus reconstruction, and species identification**

386 Three specific databases were used to identify each set of nanopore reads. The coral  
387 18S rRNA database contains full-length 18S rRNA for 140 scleratinia and 2 *Millepora*  
388 [12]. Five 18S rRNA sequences of Symbiodiniaceae (gi:176088, 12247076,  
389 12247077, 148734588 and 12247080) were added in the database in order to detect  
390 and remove undesirable Symbiodiniaceae 18S amplified. The ITS2 database  
391 contains 432 sequences of Symbiodiniaceae [18] and finally the Greengenes  
392 database (v.13.5, <http://greengenes.lbl.gov>) was used to detect 16S rRNA reads. All  
393 nanopore reads were mapped on each database with minimap2 (v 2.0-r191) with the  
394 pre-set options “map-ont” [56]. For coral identification, the reference sequence that  
395 had the most sequences mapped to it was the only one retained in each sample.  
396 Then a second round of mapping (same parameters) was done on the selected  
397 reference in order to aggregate reads potentially mis-assigned during the first round  
398 of mapping. Two Maximum Likelihood phylogenetic trees with newly reconstructed  
399 sequences and the coral 18S rRNA database were further reconstructed, one with all  
400 sequences except Acroporidae and the other with Acroporidae only. For  
401 Symbiodiniaceae and the bacterial community the same strategy was conducted  
402 except that all references covered with a minimum of 1% (for ITS2 sequences) or  
403 0.01% (for 16S rRNA sequences) of all reads mapped were kept for the second  
404 round of mapping. In addition for the bacterial community, reads mapped on  
405 eukaryote chloroplastic 16S were removed after the first mapping. SAMtools and

406 BCFtools were used to reconstruct consensus sequences for each reference  
407 sequence covered with more than 10 nanopore reads with the following programs  
408 and options: mpileup -B -a -Q 0 -u; bcftools call -c --ploidy 1;vcfutils.pl vcf2fastq. All  
409 steps were proceeded on board of the research vessel *Tara*, at sea.

#### 410 **Illumina sequencing and analysis of Symbiodiniaceae amplicons**

411 The same PCR pools obtained onboard *Tara* were, later in laboratory, used for the  
412 sequencing of ITS2 amplicons on Illumina instruments in order to compare with ONT  
413 sequencing. 100 ng were directly end-repaired, A-tailed and ligated to Illumina  
414 adapters on a Biomek FX Lab Auto Workstation (Beckman Coulter). Then, library  
415 amplification was performed using Kapa Hifi HotStart NGS library Amplification kit  
416 and purified with AMPure XP (1 volume). Libraries concentrations were normalized to  
417 10 nM by addition of Tris-Cl 10 mM, pH 8.5 and then applied to cluster generation  
418 according to the Illumina Cbot User Guide (Part # 15006165). Libraries were  
419 sequenced on a MiSeq instrument with paired end (2 × 300 bp). The taxonomic  
420 assignation of Illumina reads was done with the “SymPortal” pipeline [17]. In addition,  
421 novel ITS2 sequences were matched against the ITS2 database with BLAST (v2.6.0)  
422 then assigned to their closest match.

#### 423 **Data availability**

424 High resolution coral pictures and sequenced reads are accessible at the European  
425 Bioinformatics Institute repository under the BioProject PRJEB32905. All accession  
426 numbers are indicated in Supplementary Table S1.

## 427 References

- 428 1. Hughes, T.P., et al., *Global warming and recurrent mass bleaching of corals*.  
429 Nature, 2017. **543**(7645): p. 373-377.
- 430 2. LaJeunesse, T.C., et al., *Systematic Revision of Symbiodiniaceae Highlights the*  
431 *Antiquity and Diversity of Coral Endosymbionts*. Curr Biol, 2018.
- 432 3. Bourne, D.G., K.M. Morrow, and N.S. Webster, *Insights into the Coral*  
433 *Microbiome: Underpinning the Health and Resilience of Reef Ecosystems*.  
434 Annual Review of Microbiology, Vol 70, 2016. **70**: p. 317-340.
- 435 4. Peixoto, R.S., et al., *Beneficial Microorganisms for Corals (BMC): Proposed*  
436 *Mechanisms for Coral Health and Resilience*. Front Microbiol, 2017. **8**.
- 437 5. Reshef, L., et al., *The coral probiotic hypothesis*. Environmental Microbiology,  
438 2006. **8**(12): p. 2068-73.
- 439 6. Lesser, M.P., et al., *Nitrogen fixation by symbiotic cyanobacteria provides a*  
440 *source of nitrogen for the scleractinian coral Montastraea cavernosa*. Marine  
441 Ecology Progress Series, 2007. **346**: p. 143-152.
- 442 7. Ben-Haim, Y., et al., *Vibrio corallilyticus sp nov., a temperature-dependent*  
443 *pathogen of the coral Pocillopora damicornis*. Int J Syst Evol Microbiol, 2003.  
444 **53**: p. 309-315.
- 445 8. Johnston, E.C., et al., *A genomic glance through the fog of plasticity and*  
446 *diversification in Pocillopora*. Sci Rep, 2017. **7**.
- 447 9. Shearer, T.L., et al., *Slow mitochondrial DNA sequence evolution in the*  
448 *Anthozoa (Cnidaria)*. Mol Ecol, 2002. **11**(12): p. 2475-87.
- 449 10. Hellberg, M.E., *No variation and low synonymous substitution rates in coral*  
450 *mtDNA despite high nuclear variation*. BMC Evol Biol, 2006. **6**: p. 24.
- 451 11. Wares, J.P., *Mitochondrial cytochrome b sequence data are not an*  
452 *improvement for species identification in scleractinian corals*. PeerJ, 2014. **2**: p.  
453 e564.
- 454 12. Arrigoni, R., et al., *A new sequence data set of SSU rRNA gene for Scleractinia*  
455 *and its phylogenetic and ecological applications*. Mol Ecol Resour, 2017. **17**(5):  
456 p. 1054-1071.
- 457 13. Suzuki, G. and K. Nomura, *Species boundaries of Astreopora corals*  
458 *(Scleractinia, Acroporidae) inferred by mitochondrial and nuclear molecular*  
459 *markers*. Zoolog Sci, 2013. **30**(8): p. 626-32.
- 460 14. Gelin, P., et al., *Reevaluating species number, distribution and endemism of the*  
461 *coral genus Pocillopora Lamarck, 1816 using species delimitation methods and*  
462 *microsatellites*. Mol Phylogenet Evol, 2017. **109**: p. 430-446.

- 463 15. LaJeunesse, T.C., *Investigating the biodiversity, ecology, and phylogeny of*  
464 *endosymbiotic dinoflagellates in the genus Symbiodinium using the its region: In*  
465 *search of a "species" level marker*. Journal of Phycology, 2001. **37**(5): p. 866-  
466 880.
- 467 16. Hume, B., et al., *An improved primer set and amplification protocol with*  
468 *increased specificity and sensitivity targeting the Symbiodinium ITS2 region*.  
469 PeerJ, 2018.
- 470 17. Hume, B.C.C., et al., *SymPortal: a novel analytical framework and platform for*  
471 *coral algal symbiont next-generation sequencing ITS2 profiling*. Mol Ecol  
472 Resour, 2019.
- 473 18. Arif, C., et al., *Assessing Symbiodinium diversity in scleractinian corals via next-*  
474 *generation sequencing-based genotyping of the ITS2 rDNA region*. Mol Ecol,  
475 2014. **23**(17): p. 4418-4433.
- 476 19. Smith, E.G., R.N. Ketchum, and J.A. Burt, *Host specificity of Symbiodinium*  
477 *variants revealed by an ITS2 metahaplotype approach*. Isme Journal, 2017.  
478 **11**(6): p. 1500-1503.
- 479 20. Ziegler, M., et al., *Biogeography and molecular diversity of coral symbionts in*  
480 *the genus Symbiodinium around the Arabian Peninsula*. Journal of  
481 Biogeography, 2017. **44**(3): p. 674-686.
- 482 21. Mouchka, M.E., I. Hewson, and C.D. Harvell, *Coral-Associated Bacterial*  
483 *Assemblages: Current Knowledge and the Potential for Climate-Driven Impacts*.  
484 Integrative and Comparative Biology, 2010. **50**(4): p. 662-674.
- 485 22. Hernandez-Agreda, A., et al., *The Microbial Signature Provides Insight into the*  
486 *Mechanistic Basis of Coral Success across Reef Habitats*. MBio, 2016. **7**(4).
- 487 23. Neave, M.J., et al., *Diversity and function of prevalent symbiotic marine bacteria*  
488 *in the genus Endozoicomonas*. Appl Microbiol Biotechnol, 2016. **100**(19): p.  
489 8315-24.
- 490 24. Hernandez-Agreda, A., R.D. Gates, and T.D. Ainsworth, *Defining the Core*  
491 *Microbiome in Corals' Microbial Soup*. Trends in Microbiology, 2017. **25**(2): p.  
492 125-140.
- 493 25. Roder, C., et al., *Microbiome structure of the fungid coral Ctenactis echinata*  
494 *aligns with environmental differences*. Mol Ecol, 2015. **24**(13): p. 3501-11.
- 495 26. Pogoreutz, C., et al., *Dominance of Endozoicomonas bacteria throughout coral*  
496 *bleaching and mortality suggests structural inflexibility of the Pocillopora*  
497 *verrucosa microbiome*. Ecology and Evolution, 2018. **8**(4): p. 2240-2252.
- 498 27. Neave, M.J., et al., *Differential specificity between closely related corals and*  
499 *abundant Endozoicomonas endosymbionts across global scales*. Isme Journal,  
500 2017. **11**(1): p. 186-200.

- 501 28. Menegon, M., et al., *On site DNA barcoding by nanopore sequencing*. PLoS  
502 One, 2017. **12**(10): p. e0184741.
- 503 29. Parker, J., et al., *Field-based species identification of closely-related plants*  
504 *using real-time nanopore sequencing*. Sci Rep, 2017. **7**(1): p. 8345.
- 505 30. Pomerantz, A., et al., *Real-time DNA barcoding in a rainforest using nanopore*  
506 *sequencing: opportunities for rapid biodiversity assessments and local capacity*  
507 *building*. Gigascience, 2018. **7**(4).
- 508 31. Santos, A., et al., *Computational methods for 16S metabarcoding studies using*  
509 *Nanopore sequencing data*. Comput Struct Biotechnol J, 2020. **18**: p. 296-305.
- 510 32. Berntson, E.A., et al., *Phylogenetic relationships within the Octocorallia*  
511 *(Cnidaria : Anthozoa) based on nuclear 18S rRNA sequences*. Marine Biology,  
512 2001. **138**(2): p. 235-246.
- 513 33. Pootakham, W., et al., *High resolution profiling of coral-associated bacterial*  
514 *communities using full-length 16S rRNA sequence data from PacBio SMRT*  
515 *sequencing system*. Sci Rep, 2017. **7**(1): p. 2774.
- 516 34. Noonan, S.H.C., K.E. Fabricius, and C. Humphrey, *Symbiodinium Community*  
517 *Composition in Scleractinian Corals Is Not Affected by Life-Long Exposure to*  
518 *Elevated Carbon Dioxide*. PLoS One, 2013. **8**(5).
- 519 35. Bayer, T., et al., *Bacteria of the genus Endozoicomonas dominate the*  
520 *microbiome of the Mediterranean gorgonian coral Eunicella cavolini*. Marine  
521 Ecology Progress Series, 2013. **479**: p. 75-+.
- 522 36. Glasl, B., G.J. Herndl, and P.R. Frade, *The microbiome of coral surface mucus*  
523 *has a key role in mediating holobiont health and survival upon disturbance*.  
524 *Isme Journal*, 2016. **10**(9): p. 2280-2292.
- 525 37. Morrow, K.M., et al., *Natural volcanic CO2 seeps reveal future trajectories for*  
526 *host-microbial associations in corals and sponges*. Isme Journal, 2015. **9**(4): p.  
527 894-908.
- 528 38. Morrow, K.M., et al., *Allelochemicals Produced by Brown Macroalgae of the*  
529 *Lobophora Genus Are Active against Coral Larvae and Associated Bacteria,*  
530 *Supporting Pathogenic Shifts to Vibrio Dominance*. Applied and Environmental  
531 Microbiology, 2017. **83**(1).
- 532 39. Neave, M.J., et al., *Endozoicomonas genomes reveal functional adaptation and*  
533 *plasticity in bacterial strains symbiotically associated with diverse marine hosts*.  
534 Sci Rep, 2017. **7**: p. 40579.
- 535 40. Cardenas, A., et al., *Excess labile carbon promotes the expression of virulence*  
536 *factors in coral reef bacterioplankton*. Isme Journal, 2018. **12**(1): p. 59-76.
- 537 41. Pollock, F.J., et al., *Coral-associated bacteria demonstrate phyllosymbiosis and*  
538 *cophylogeny*. Nature Communications, 2018. **9**.



- 539 42. Cardenas, A., et al., *Shifts in bacterial communities of two caribbean reef-*  
540 *building coral species affected by white plague disease*. *Isme Journal*, 2012.  
541 **6**(3): p. 502-512.
- 542 43. Gajigan, A.P., L.A. Diaz, and C. Conaco, *Resilience of the prokaryotic microbial*  
543 *community of Acropora digitifera to elevated temperature*. *Microbiologyopen*,  
544 2017. **6**(4).
- 545 44. Shnit-Orland, M., A. Sivan, and A. Kushmaro, *Shewanella corallii sp. nov., a*  
546 *marine bacterium isolated from a Red Sea coral*. *Int J Syst Evol Microbiol*, 2010.  
547 **60**: p. 2293-2297.
- 548 45. Ziegler, M., et al., *Coral microbial community dynamics in response to*  
549 *anthropogenic impacts near a major city in the central Red Sea*. *Marine*  
550 *Pollution Bulletin*, 2016. **105**(2): p. 629-640.
- 551 46. Paramasivam, N., et al., *Bacterial Consortium of Millepora dichotoma Exhibiting*  
552 *Unusual Multifocal Lesion Event in the Gulf of Eilat, Red Sea*. *Microbial Ecology*,  
553 2013. **65**(1): p. 50-59.
- 554 47. Paramasivam, N., et al., *Eilatimonas milleporae gen. nov., sp. nov., a marine*  
555 *bacterium isolated from the hydrocoral Millepora dichotoma*. *Int J Syst Evol*  
556 *Microbiol*, 2013. **63**(Pt 5): p. 1880-4.
- 557 48. Spring, S., et al., *The Photosynthetic Apparatus and Its Regulation in the*  
558 *Aerobic Gammaproteobacterium Congregibacter litoralis gen. nov., sp nov.*  
559 *PLoS One*, 2009. **4**(3).
- 560 49. Roder, C., et al., *Bacterial profiling of White Plague Disease in a comparative*  
561 *coral species framework*. *Isme Journal*, 2014. **8**(1): p. 31-9.
- 562 50. Sekar, R., et al., *Microbial communities in the surface mucopolysaccharide layer*  
563 *and the black band microbial mat of black band-diseased Siderastrea siderea*.  
564 *Appl Environ Microbiol*, 2006. **72**(9): p. 5963-73.
- 565 51. Blackall, L.L., B. Wilson, and M.J. van Oppen, *Coral-the world's most diverse*  
566 *symbiotic ecosystem*. *Mol Ecol*, 2015. **24**(21): p. 5330-47.
- 567 52. LaJeunesse, T.C., *"Species" radiations of symbiotic Dinoflagellates in the*  
568 *Atlantic and Indo-Pacific since the Miocene-Pliocene transition (vol 22, pg 570,*  
569 *2005)*. *Molecular Biology and Evolution*, 2005. **22**(4): p. 1158-1158.
- 570 53. Hume, B.C., et al., *Ancestral genetic diversity associated with the rapid spread*  
571 *of stress-tolerant coral symbionts in response to Holocene climate change*. *Proc*  
572 *Natl Acad Sci U S A*, 2016. **113**(16): p. 4416-21.
- 573 54. Thornhill, D.J., et al., *Host-Specialist Lineages Dominate the Adaptive Radiation*  
574 *of Reef Coral Endosymbionts*. *Evolution*, 2014. **68**(2): p. 352-367.
- 575 55. Li, C.H., et al., *INC-Seq: accurate single molecule reads using nanopore*  
576 *sequencing*. *Gigascience*, 2016. **5**.

577 56. Li, H., *Minimap2: pairwise alignment for nucleotide sequences*. Bioinformatics,  
578 2018.

579

## 580 **Acknowledgements**

581 This project has been funded through the *Tara* Pacific consortium, France  
582 Genomique grant number ANR-10-INBS-09, and the Genoscope/CEA. We are keen  
583 to thank the commitment of the people and the following institutions and sponsors  
584 who made this singular expedition possible: CNRS, CSM, PSL, KAUST,  
585 Genoscope/CEA, ANR-CORALGENE, agnès b., the Veolia Environment Foundation,  
586 Region Bretagne, Serge Ferrari, Billerudkorsnas, AmerisourceBergen Company,  
587 Lorient Agglomération, Oceans by Disney, the Prince Albert II de Monaco  
588 Foundation, L'Oreal, Biotherm, France Collectivites, Kankyo Station, Fonds Francais  
589 pour l'Environnement Mondial (FFEM), Etienne Bourgois, UNESCO-IOC, the Tara  
590 Foundation teams and crew. Tara Pacific would not exist without the continuous  
591 support of the participating institutes.

## 592 **Author Contributions**

593 JP, QC and PW designed the study. QC wrote the paper with substantial input from  
594 JP, BH, EB, CV, MZ, SP and PW. EB collected coral samples. JP coordinated *in situ*  
595 experiments and nanopore sequencing assisted by QC. QC, BH, MZ and EB  
596 performed barcoding data analyses. JP, QC, CC and SE contributed to the  
597 development of protocols and tools for nanopore sequencing and analysis. All  
598 authors discussed the results and commented on the manuscript.



## 599 Additional Information

600 The authors declare no competing interests.

## 601 Figure Legends

602 **Figure 1: Map of the sampling sites.** The four sampling sites are indicated by red  
603 dots on the Kimbe Bay map. The first site (P01) is close to Otto's Reef, the three  
604 other sites (P03, P06 and P08) are around the Kimbe Island.

605 **Figure 2: Pipeline for *in situ* analysis of coral holobionts.** The approximate times  
606 for each step correspond to the processing of 12 coral samples. Protocols and tools  
607 parameters are detailed in the method section.

608 **Figure 3: Coral holobiont network.** Network representation of a force directed  
609 graph of Symbiodiniaceae and bacterial families living within or around each coral  
610 colony. Coral colonies are represented by a square and coloured according to their  
611 taxonomy (family level). Each node connected to a coral colony represents an  
612 organism living within or around the colony. Symbiodiniaceae taxa identified with  
613 nanopore sequencing are represented by a circle coloured by taxonomic origin; red  
614 for *Cladocopium* (clade C) and orange for *Durusdinium* (clade D). ITS2 sequences  
615 are indicated inside each circle. Each bacterial sequence is represented by a triangle  
616 and its family of origin is indicated below. Symbiodiniaceae ITS2 sequences and  
617 Bacteria 16S rRNA sequences covered with less than 5% and 1% of all mapped  
618 reads respectively are not represented in this figure.

619 **Figure 4: Symbiodiniaceae ITS2 diversity in coral colonies sequenced with ONT  
620 or Illumina technology.** Each coloured bar represents the proportion of  
621 Symbiodiniaceae ITS2 detected in a coral colony which have a relative abundance  
622 above 5%. The total number of reads is indicated on top of each bar. The name of  
623 each ITS2 sequence is indicated and represented by a specific color. Corals  
624 colonized by Symbiodiniaceae of *Cladocopium* genus are on the left panel,  
625 *Durusdinium* genus on the middle panel and by both genera on the right panel. a)  
626 PCR amplicons sequenced with ONT. b) Same PCR amplicons sequenced with  
627 Illumina technology.

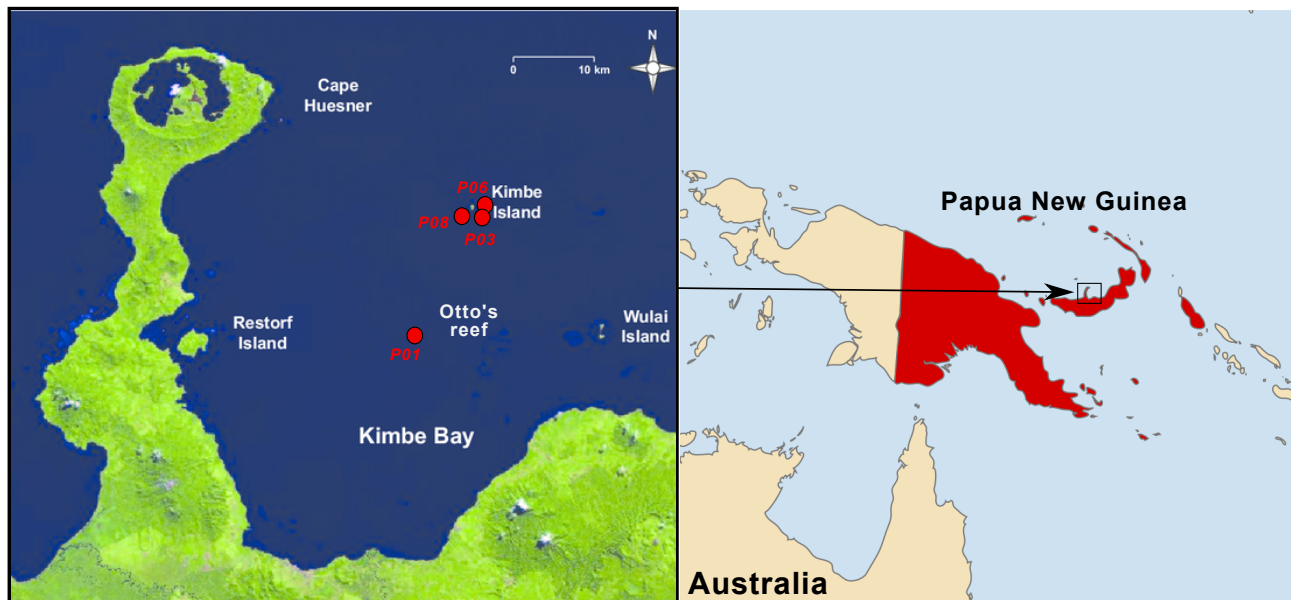

Figure 1

## DNA extraction: 2h

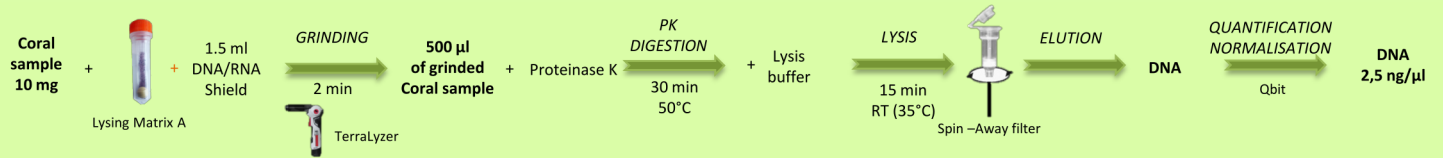

## PCR and barcoding: 5h

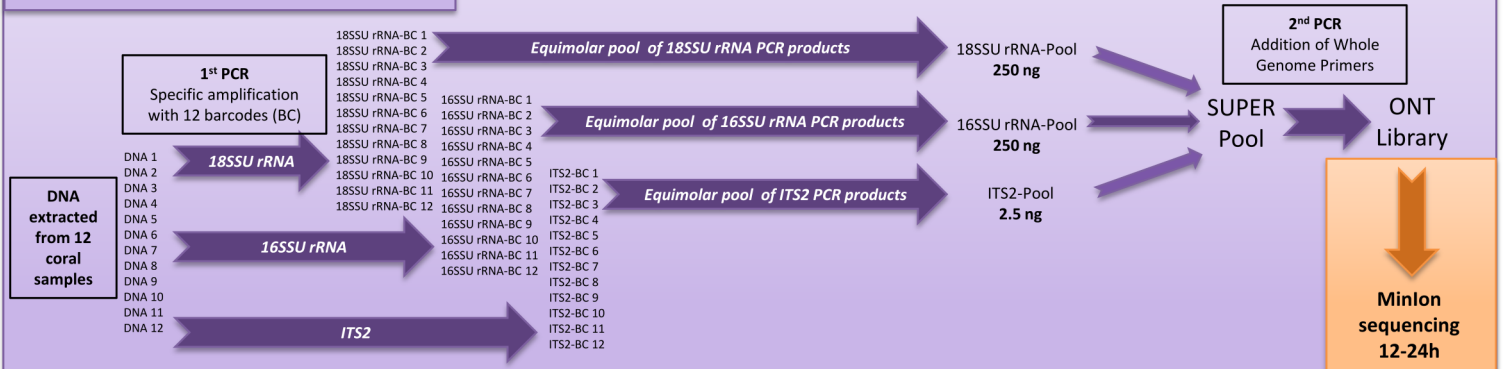

## Nanopore reads analyses: 2h

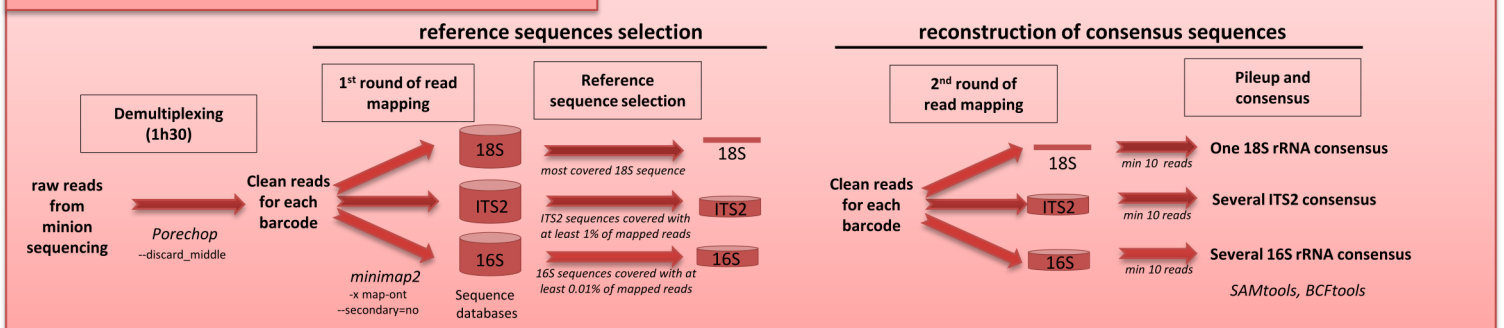

Figure 2

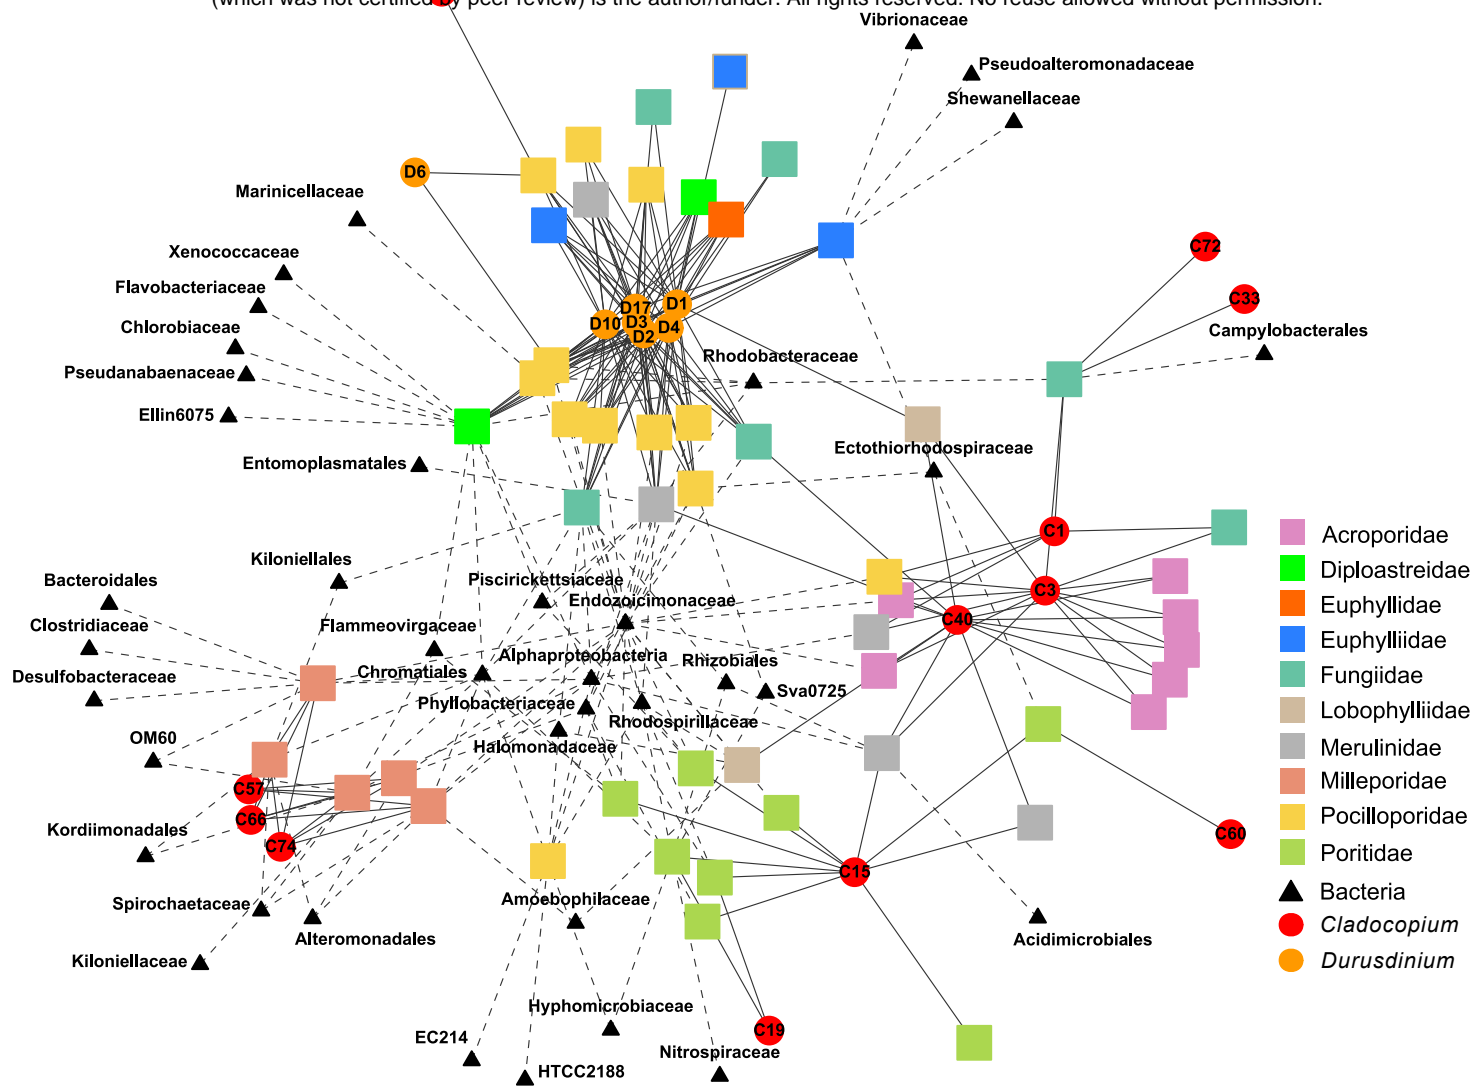

Figure 3

**a**

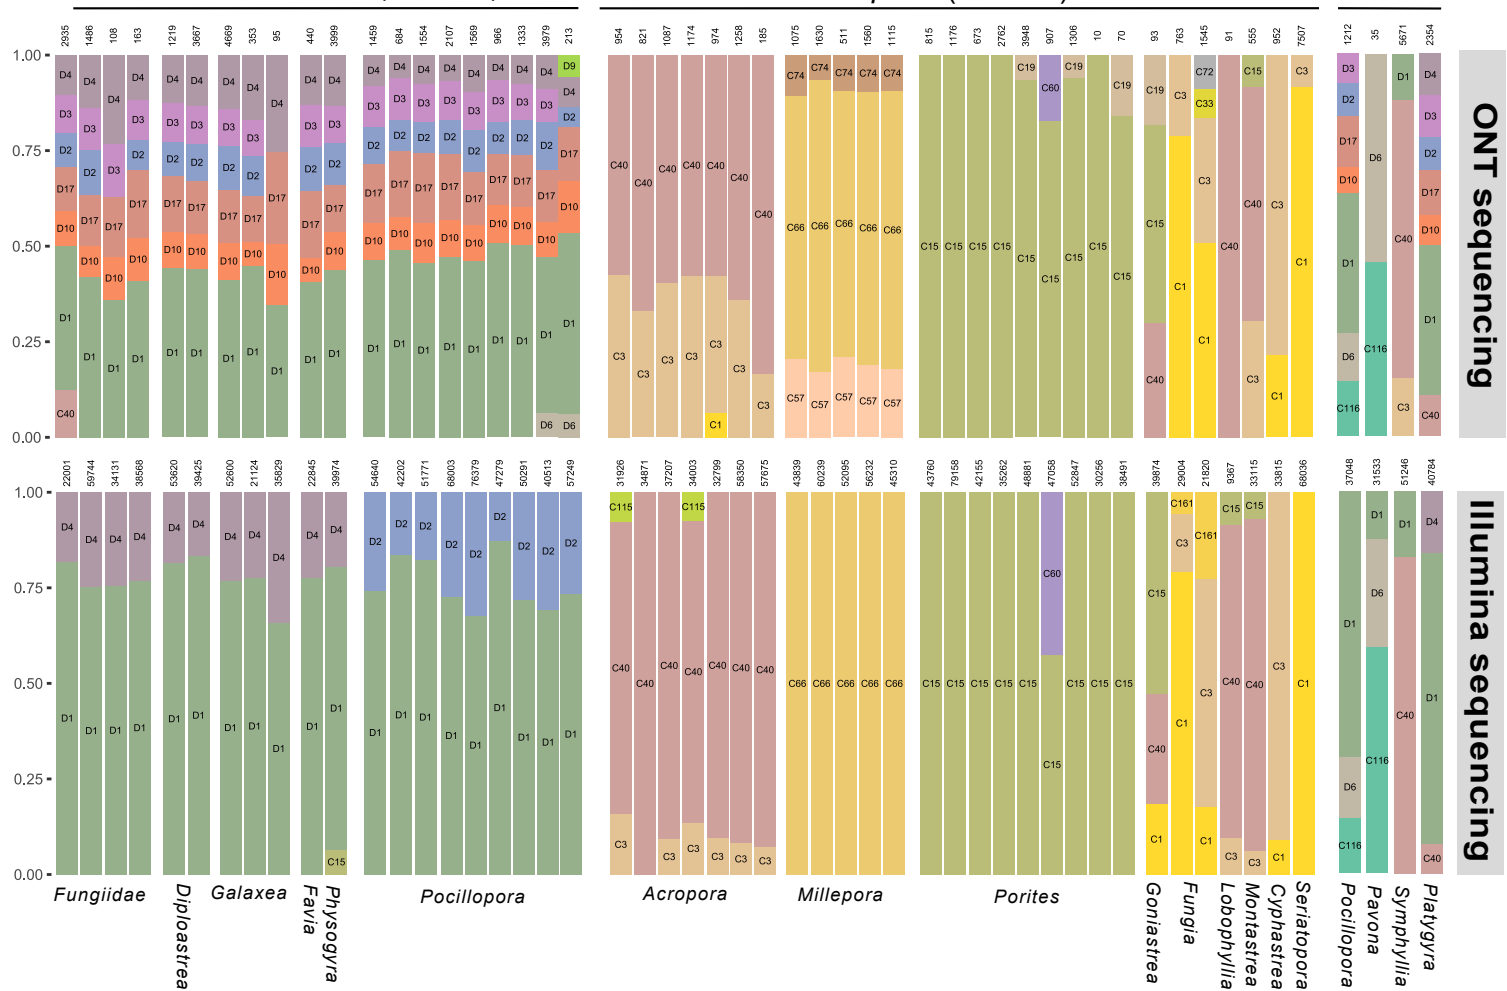

**b**

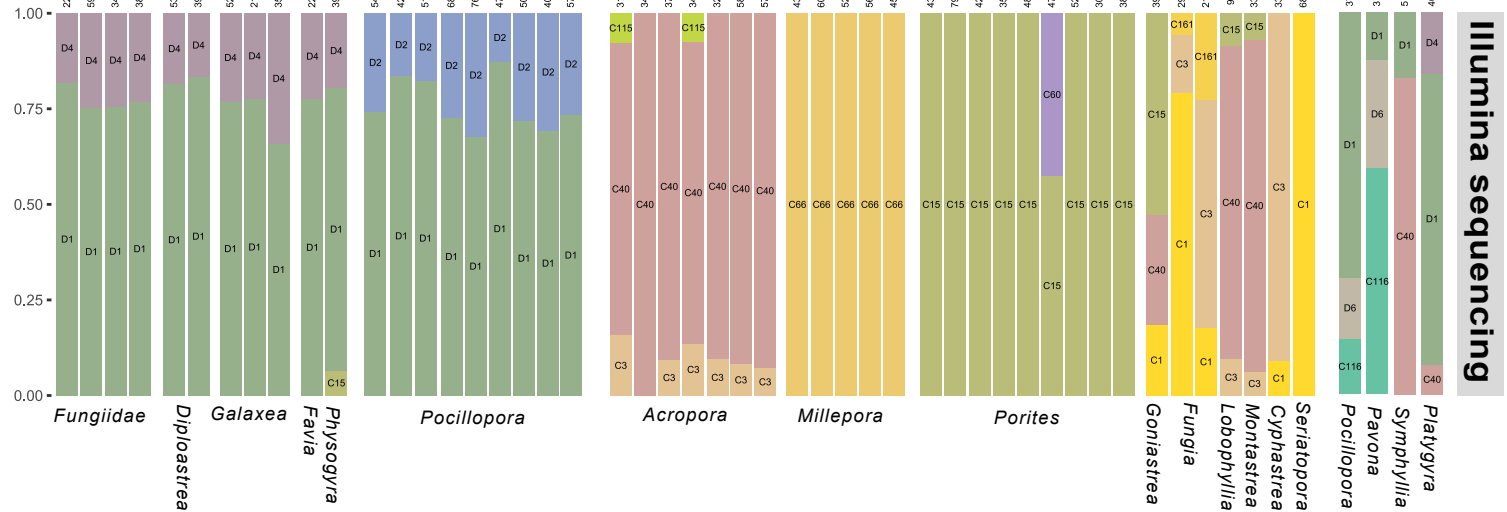

**Figure 4**
