# Supplementary material for: A framework for in situ molecular characterization of coral holobionts using nanopore sequencing
Source: bioRxiv or medRxiv preprint supplement (doi:10.1101/2020.05.25.071951), 2020-05-27
Supplement: Supplementary file [file media-1.pdf]

**a**

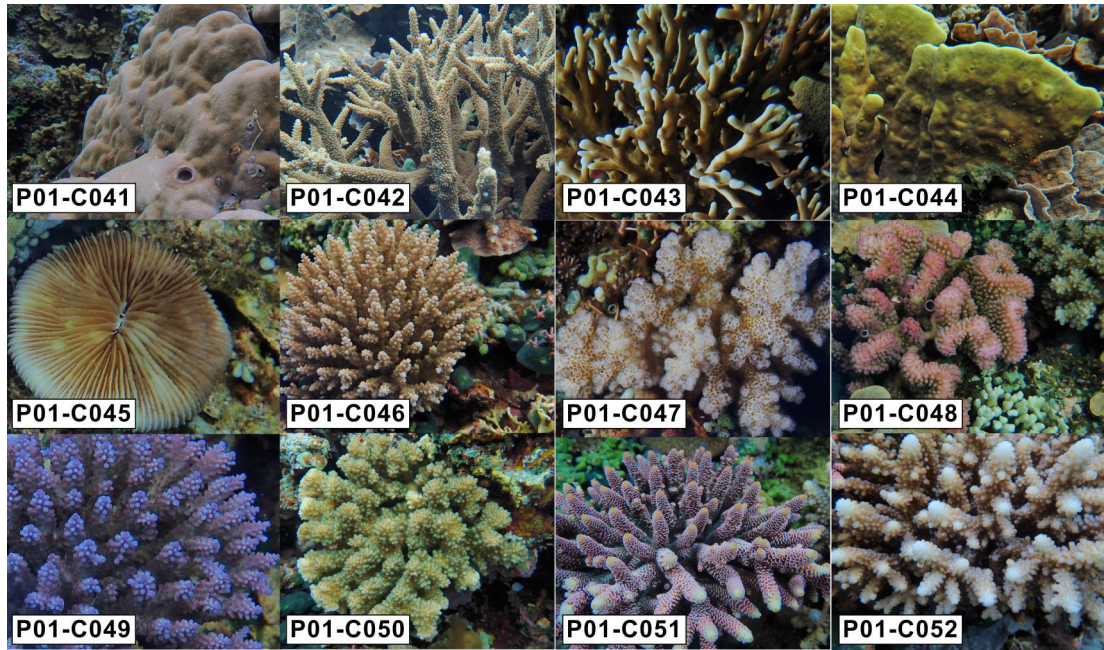

**b**

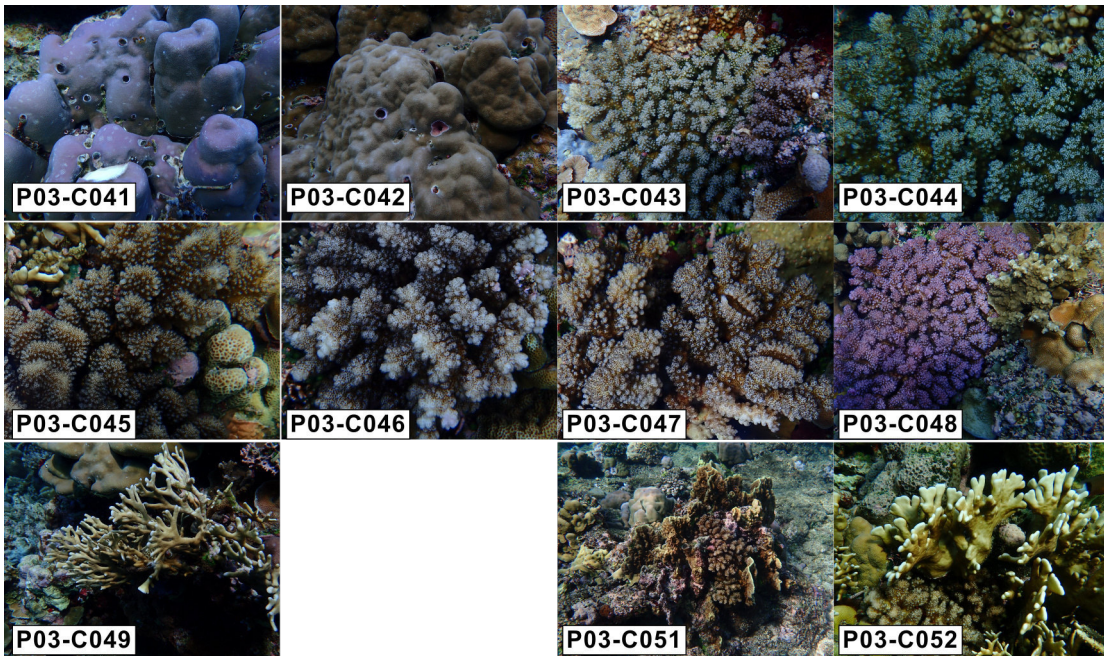

**c**

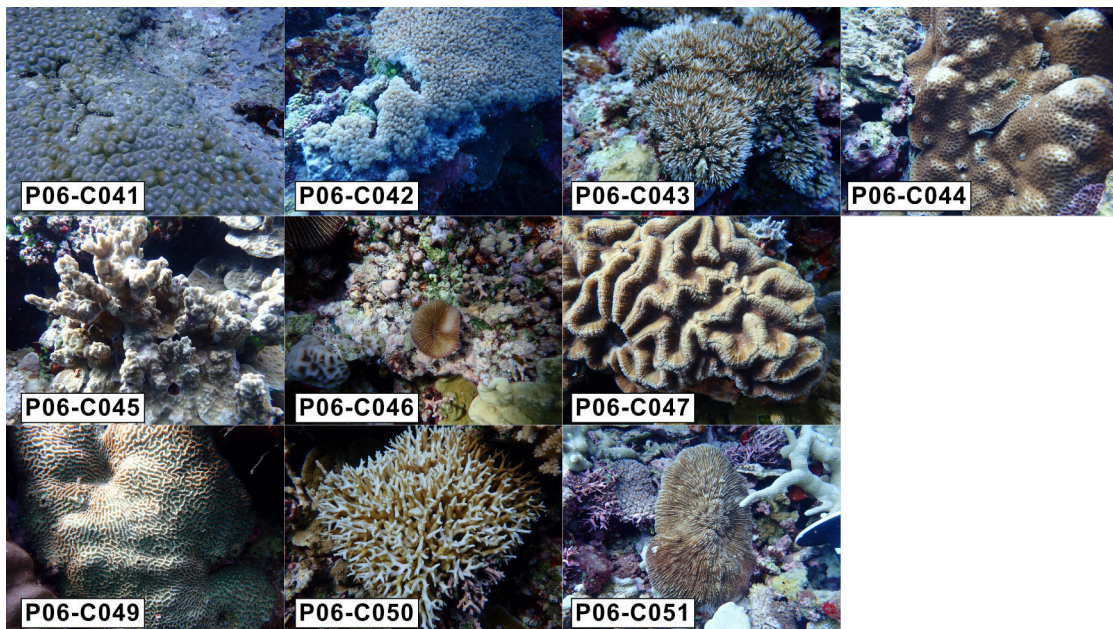

d

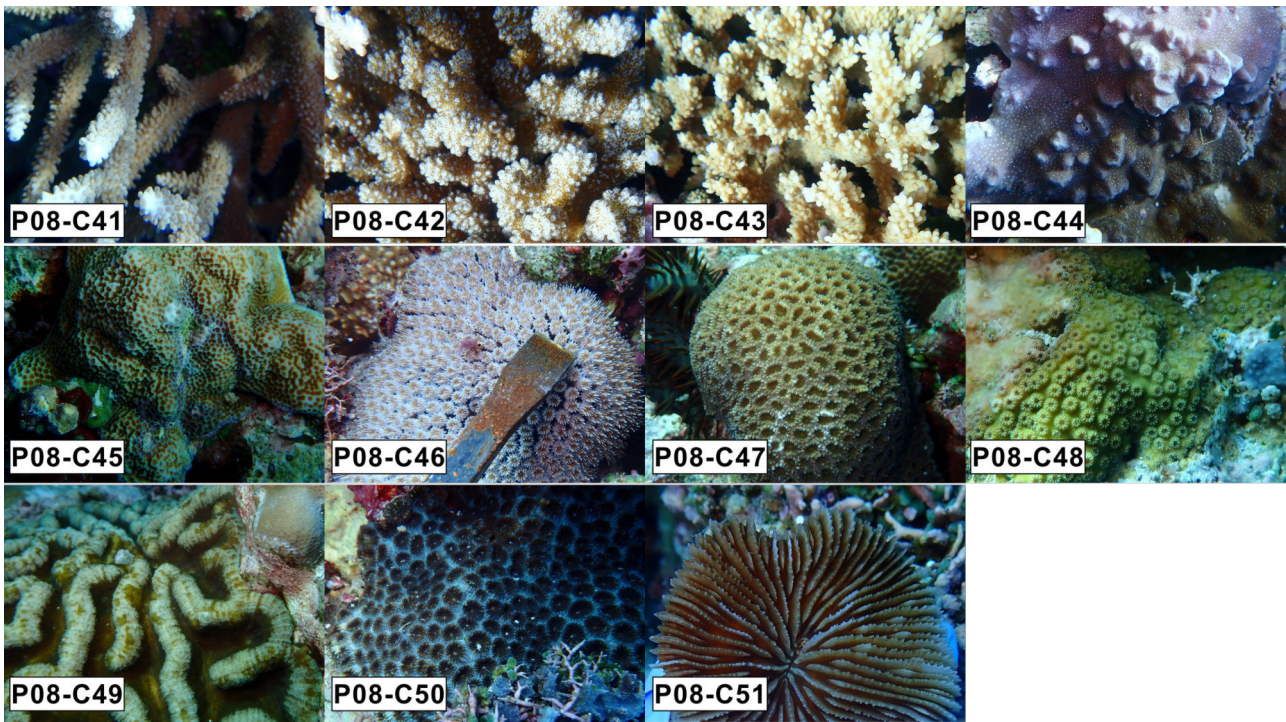

e

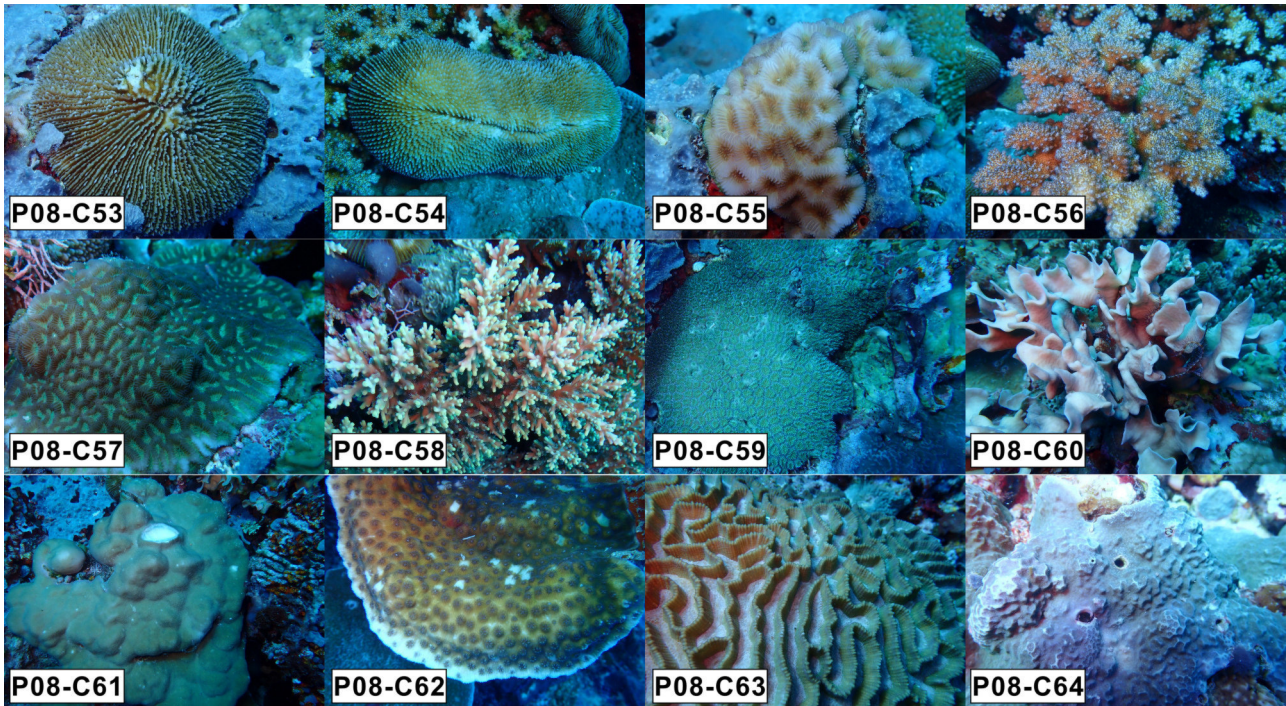

**Supplementary Figure S1: Pictures of sampled coral colonies.** a) P01-Run1. *Porites lobata* (C41), *Acropora* (C42), *Millepora dichotoma* (C43), *Millepora platyphylla* (C44), *Fungia* (C45), *Pocillopora damicornis* (C46), *Acropora* (C47), *Pocillopora meandrina* (C48), *Pocillopora verrucosa* (C49), *Acropora* (C50), *Acropora* (C51), *Acropora* (C52). b) P03-Run2. *Porites* (C41), *Porites lobata* (C42), *Pocillopora verrucosa* (C43), *Pocillopora verrucosa* (C44), *Pocillopora* (C45), *Pocillopora meandrina* (C46), *Pocillopora verrucosa* (C47), *Pocillopora* (C48), *Millepora dichotoma* (C49), *Millepora platyphylla* (C51), *Millepora dichotoma* (C52). c) P06-Run3. *Diploastrea* (C41), *Physogyra* (C42), *Galaxea* (C43), *Favites* (C44), *Porites rus* (C45), *Fungia* (C46), *Symphyllia* (C47), *Platygyra* (C49), *Seriatopora* (C50), *Fugiidae* (C51). d) P08-Run4. *Acropora* (C41), *Pocillopora verrucosa* (C42), *Acropora* (C43), *Porites rus* (C44), *Porites* (C45), *Galaxea* (C46), *Montastrea* (C47), *Cyphastrea* (C48), *Lobophyllia* (C49), *Favia* (C50), *Fungia* (C51). e) P08-Run5. *Fungia* (C53), *Fungia* (C54), *Pocillopora* (C56), *Goniastrea* (C57), *Acropora* (C58), *Galaxea* (C59), *Pavona cactus* (C60), *Porites Lobata* (C61), *Echinopora* (C62), *Oulophyllia* (C63), *Porites* (C64).
