# Supplementary material for: A framework for in situ molecular characterization of coral holobionts using nanopore sequencing
Source: bioRxiv or medRxiv preprint supplement (doi:10.1101/2020.05.25.071951), 2020-05-27
Supplement: Supplementary file [file media-2.pdf]

**a**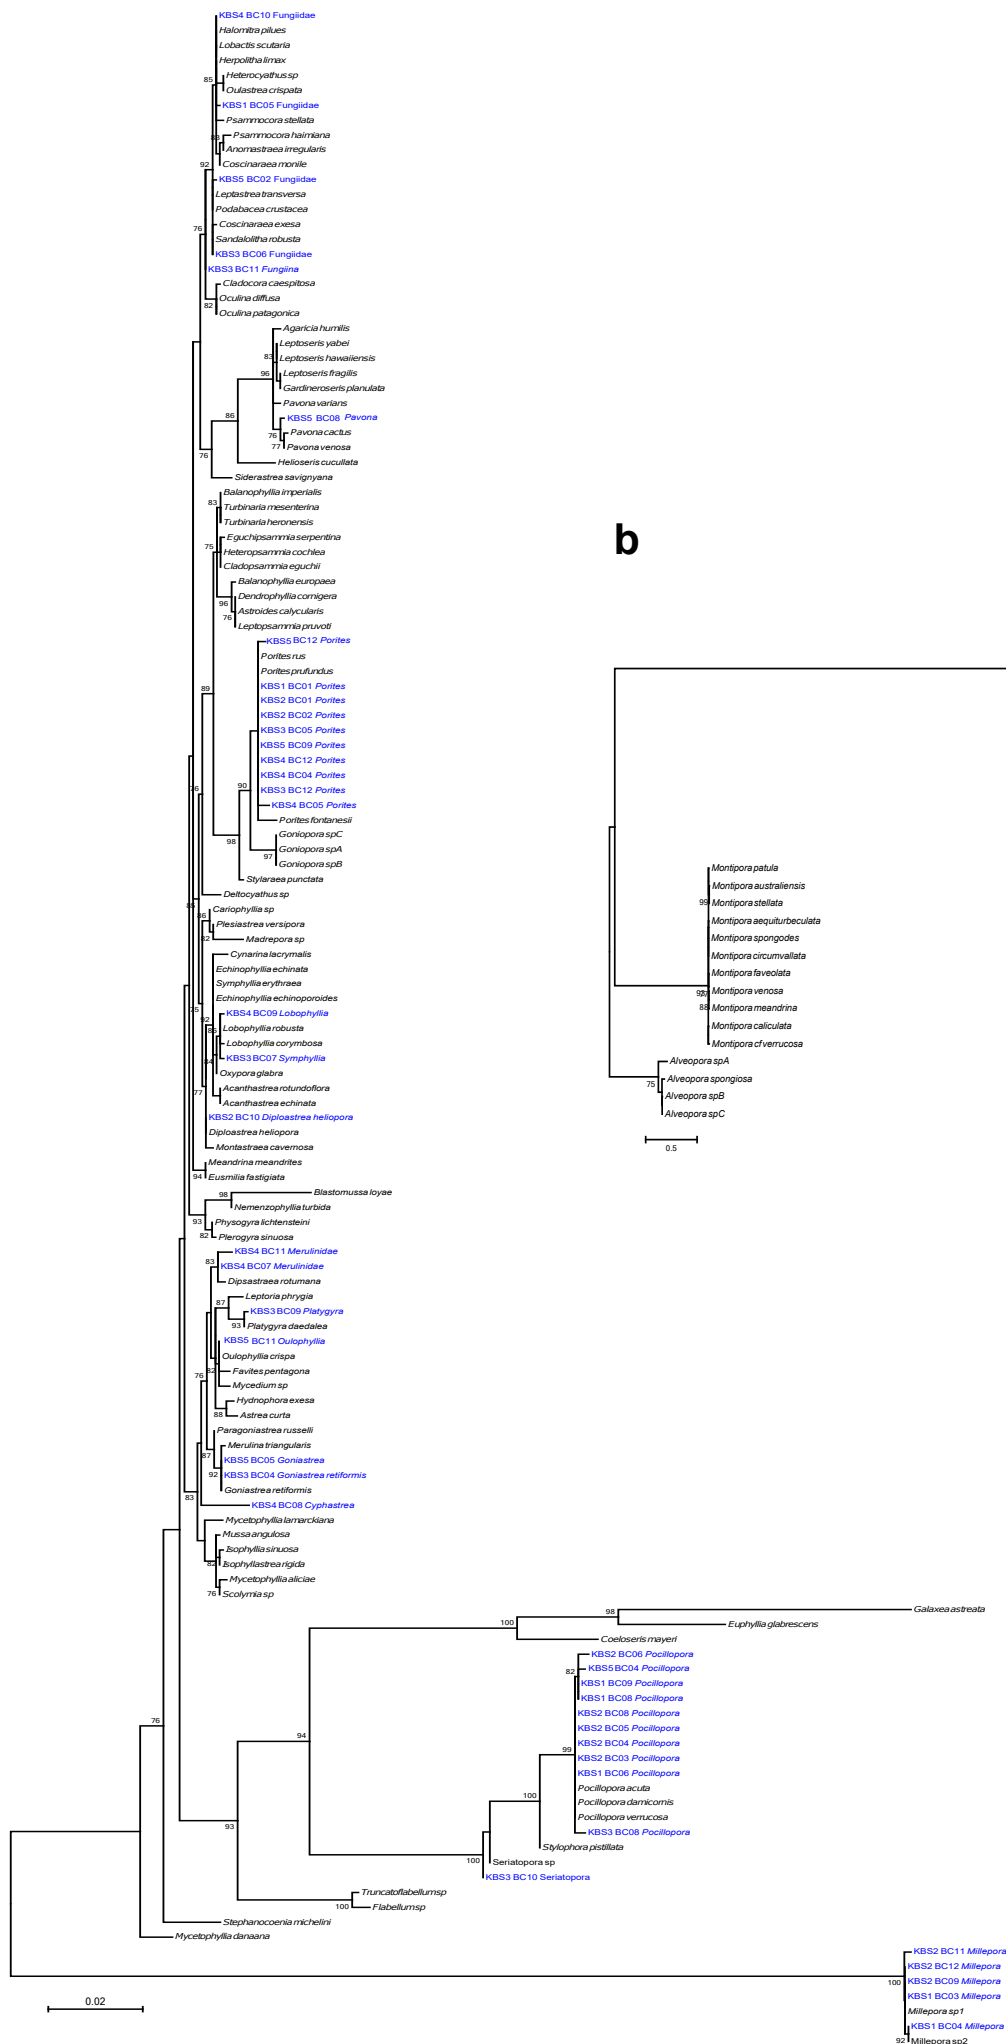

**Supplementary Figure S2: Maximum Likelihood phylogenetic tree of coral 18S rRNA sequences.** Sequences reconstructed in this study together with all 18S rRNA sequences from Arrigoni et al. 2018 are represented (12). (a) All corals except Acroporidae. (b) All Acroporidae 18S rRNA.
